# Supplementary material for: Expanded Access Study of Palbociclib Plus Letrozole for Postmenopausal Women with HR+/HER2− Advanced Breast Cancer in Latin America for Whom Letrozole Therapy is Deemed Appropriate
Source: PubMed Central journal article supplement — Clin Drug Investig. 2023 Aug 18;43(9):699–706. doi: 10.1007/s40261-023-01294-3 (PMC10514159; doi:10.1007/s40261-023-01294-3), 2023-08-18

**Supplementary Material**  
***Clinical Drug Investigation***

**Expanded Access Study of Palbociclib Plus Letrozole for Postmenopausal Women With HR+/HER2– Advanced Breast Cancer in Latin America for Whom Letrozole Therapy Is Deemed Appropriate**

**Authors:** Luis Fein, Nicolas Lazaretti, Yamil López Chuken, J. Rogelio González Ramírez Benfield, Max S. Mano, Jose Lobaton, Ernesto Korbenfeld, Fernanda Damian, Dongrui R. Lu, Ave Mori, Shem J. Patyna, Sandra Franco

List of independent ethics committee (IEC) or institutional review board (IRB)

| Country   | Study site number | Name                                                                                                                                                                           |
|-----------|-------------------|--------------------------------------------------------------------------------------------------------------------------------------------------------------------------------|
| Argentina | 1001              | Comite de Etica Dr Claude Bernard                                                                                                                                              |
|           | 1005              | Comite de Etica "Dr. Claude Bernard"                                                                                                                                           |
|           | 1006              | Comite de Revision Institucional del Hospital Britanico de Buenos Aires                                                                                                        |
|           | 1015              | Comite de Etica e Investigacion Fundacion Sanatorio Guemes                                                                                                                     |
|           | 1022              | Comite de Etica en Investigacion del Instituto Medico Especializado Alexander Fleming                                                                                          |
| Brazil    | 1003              | Comite de Etica em Pesquisa da Universidade de Passo Fundo- Universidade de Passo Fundo<br>CONEP - Comissao Nacional de Etica em Pesquisa                                      |
|           | 1008              | Comite de Etica em Pesquisa da Pontificia Univerisdade Catolica do Rio Grande do Sul – PUCRS<br>CONEP - Comissao Nacional de Etica em Pesquisa                                 |
|           | 1009              | Comite de Etica em Pesquisa do Hospital Pro-Cardiaco<br>CONEP - Comissao Nacional de Etica em Pesquisa<br>Comite de Etica em Pesquisa do Hospital Copa D'or                    |
|           | 1011              | CONEP - Comissao Nacional de Etica em Pesquisa<br>Comite de Etica em Pesquisa Centro de Referencia da Saude da Mulher – CRSM                                                   |
|           | 1012              | Comite de Etica em Pesquisa do Hospital Sirio Libanes<br>CONEP - Comissao Nacional de Etica em Pesquisa                                                                        |
| Colombia  | 1002              | Comite de Etica de la Investigacion Riesgo de Fractura S.A.                                                                                                                    |
|           | 1021              | Comite de etica e investigaciones del Instituto medico de alta tecnologia IMAT                                                                                                 |
|           | 1023              | Comite de etica Independiente Instituto de Cancerologia S.A.                                                                                                                   |
|           | 1024              | Comite de Bioetica Universidad Tecnologica de Pereira                                                                                                                          |
| Mexico    | 1004              | Comite de Investigacion de la Unidad Clinica de Bioequivalencia S de R.L de C.V<br>Comite de Etica en Investigacion de la Unidad Clinica de Bioequivalencia de S de R.L de C.V |
|           | 1010              | Comite de Etica en Investigacion del Instituto Nacional de Cancerologia<br>Comite de Investigacion del Instituto Nacional de Cancerologia                                      |
|           | 1014              | Comite de Etica en Investigacion del Hospital Universitario Dr. Jose Eleuterio Gonzalez                                                                                        |
|           | 1019              | Comite de Etica en Investigacion de Mexico Centre For Clinical Research, S.A de C.V.<br>Comite de Investigacion de Mexico Centre for Clinical Research, S.A. de C.V.           |

**Supplementary Figure 1.** Patient Attrition Diagram. AE, adverse event.

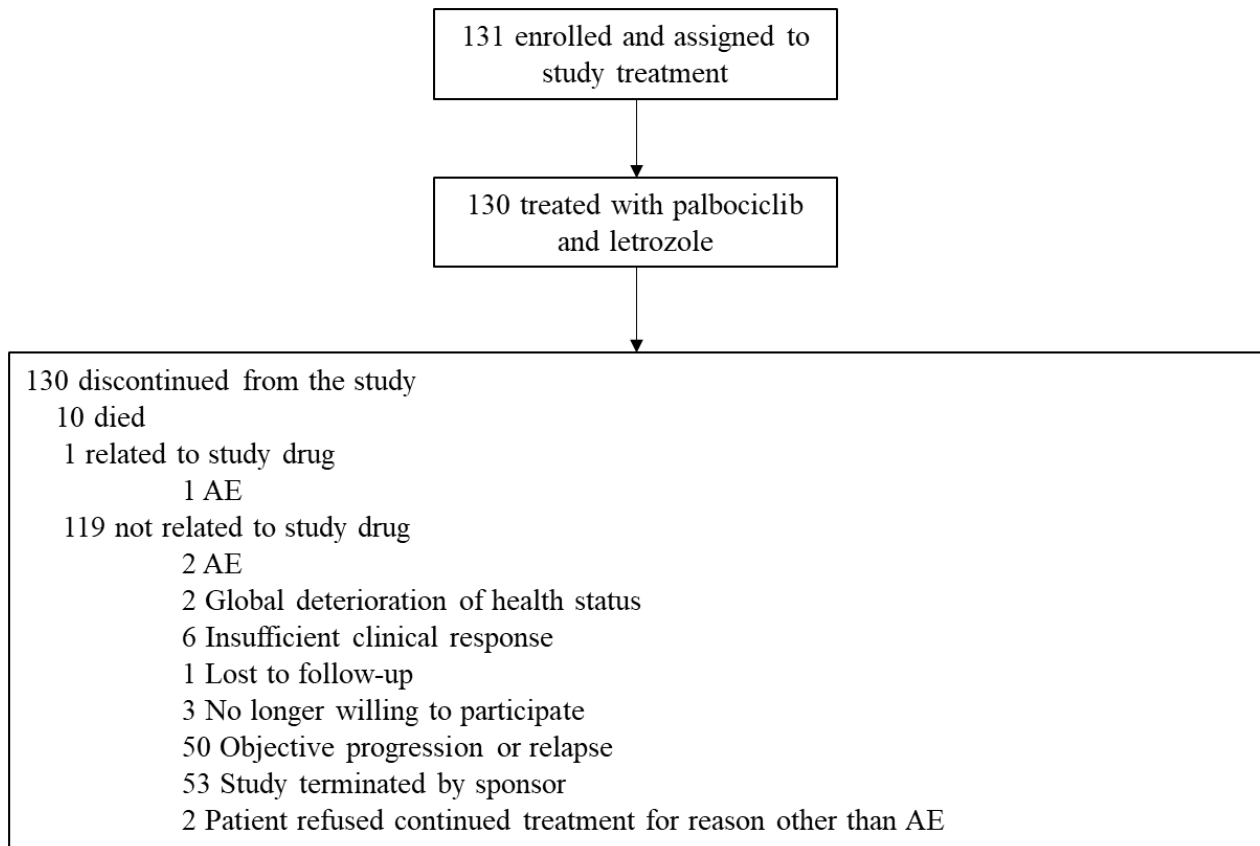

Supplement: 40261_2023_1294_MOESM1_ESM.pdf [file 40261_2023_1294_MOESM1_ESM.pdf]
